# Supplementary material
Source: publisher figshare collection journal article supplement (https://gsapubs.figshare.com/articles/dataset/_/15019629)
Supplement: Supplementary file 1 [file 1]

## Sheet: Table S1
Sullivan, R., Fay, R.P., Schaefer, C., Deino, A., and Edwards, S.W., 2021, Neogene volcanism on the eastside of Mount Diablo, Contra
Costa County California, in Sullivan, R., Sloan, D., Unruh, J.R., and Schwartz, D.P., eds., Regional Geology of Mount Diablo, California: Its
Tectonic Evolution on the North America Plate Boundary: Geological Society of America Memoir 217, https://doi.org/10.1130/2021.1217(11).
Table S1. 39Ar analytical data
						Relative Isotopic Abundances										Derived Results										Inverse Isochron Data
Lab ID#	Watts	°C	Irrad.	J		40Ar		39Ar		38Ar		37Ar		36Ar		39Ar Mol	39Ar %	Ca/K		40Ar*/39Ar		%40Ar*	Age (Ma)		w/±J	36Ar/40Ar		39Ar/40Ar		36Ar/39Ar
				( X 10-3) ± 1s		±1s		±1s		±1s		±1s		±1s		¥ 10-15	of total	±1s		±1s			±1s		±1s	±%1s		±%1s		Er. Corr.
EBH18/MCB-1
27706-01A	1	0	478B	0.7321	0.0005	22620	60	224	1.4	17.9	1.2	10	7	72	1	0.00631012	0.20302	0.17	0.12	5.07232	1.39928	5.02418	6.8	1.9	1.86784	0.0031811	1.45623	0.0099051	0.692027	0.0717965
27706-01B	1.2	0	478B	0.7321	0.0005	39950	60	957	3	32.9	1.9	13	7	119.1	1.3	0.0269545	0.867366	0.05	0.03	4.5967	0.406495	11.0124	6.1	0.5	0.542816	0.0029806	1.09049	0.0239573	0.340922	0.0728333
27706-01C	1.73	0	478B	0.7321	0.0005	110640	80	13475	12	187	4	51	7	113.4	1.3	0.381061	12.2129	0.0143	0.002	5.69634	0.0293747	69.3968	7.62	0.04	0.0395258	0.001025	1.12959	0.121827	0.11404	0.0420413
27706-01D	2.25	0	478B	0.7321	0.0005	148360	90	24310	18	294	3	67	7	31.3	0.9	0.687696	22.0331	0.0102	0.0011	5.71711	0.0120488	93.7047	7.644	0.016	0.0168766	0.0002108	2.7794	0.163902	0.0951958	0.0136812
27706-01E	2.93	0	478B	0.7321	0.0005	215210	90	36090	20	431	5	103	7	27.4	0.9	1.02125	32.7098	0.0106	0.0007	5.7357	0.0084381	96.2094	7.669	0.011	0.0123816	0.000127	3.18866	0.167738	0.0755759	0.0077715
27706-01F	3.81	0	478B	0.7321	0.0005	205060	100	34870	20	430	4	474	7	20.1	0.9	0.987388	31.604	0.0521	0.0008	5.70869	0.0088978	97.1029	7.633	0.012	0.0129324	9.7e-05	4.4265	0.170096	0.0819344	0.006436
27706-01G	4.95	0	478B	0.7321	0.0005	2420	70	408	2	4.1	1.3	-1	7	-0.8	0.7	0.0115448	0.369786	-0.01	0.06	6.55516	0.523687	110.428	8.8	0.7	0.698316	-0.0003493	-80.2511	0.16846	2.794	0.0334815
EBH18/MCB-1 - Aliquot #2
27706-02A	1	0	478B	0.7321	0.0005	3370	60	50	1.1	2	1	0	7	10.5	0.7	0.00140909	0.0251374	0	0.5	4.8625	4.48783	7.22368	6	6	5.99152	0.0031075	7.14979	0.0148559	2.75094	0.155295
27706-02B	1.2	0	478B	0.7321	0.0005	12090	60	334.6	2	11.2	1.3	5	7	33.4	1	0.00942553	0.16822	0.06	0.08	6.34277	0.868078	17.5577	8.5	1.2	1.1577	0.0027613	2.89109	0.0276815	0.78193	0.113739
27706-02C	1.73	0	478B	0.7321	0.0005	128820	90	12771	12	194	4	51	7	185.9	1.7	0.361856	6.4206	0.015	0.002	5.73989	0.0410979	56.9175	7.67	0.05	0.055075	0.001443	0.927348	0.0991614	0.113769	0.0438722
27706-02D	2.25	0	478B	0.7321	0.0005	171800	90	27651	18	352	4	49	7	30.8	1	0.783711	13.9015	0.0064	0.001	5.87928	0.0115008	94.65	7.86	0.015	0.0162265	0.0001792	3.11045	0.160989	0.0838511	0.0110055
27706-02E	2.93	0	478B	0.7321	0.0005	258380	100	42380	20	518	4	77	7	31.5	0.9	1.20183	21.3065	0.0066	0.0006	5.87399	0.0078591	96.3625	7.853	0.01	0.0117378	0.0001218	2.9606	0.164049	0.0727024	0.0077114
27706-02F	3.81	0	478B	0.7321	0.0005	689183	150	115140	60	1392	8	863	7	64.7	1.2	3.26665	57.8865	0.0286	0.0002	5.81723	0.0046283	97.2163	7.777	0.006	0.0080896	9.32e-05	1.90504	0.167118	0.0576627	0.00436
27706-02G	4.95	0	478B	0.7321	0.0005	3840	70	580	3	10.8	1.4	8	7	1.2	0.7	0.0164617	0.291594	0.06	0.04	6.00233	0.393157	90.6825	8	0.5	0.524479	0.0003121	60.6641	0.151079	1.84358	0.0284608
EBH18/MCB-1 - Aliquot #3
27706-03A	1	0	478B	0.7321	0.0005	7070	60	73.5	1.2	5.4	1.2	1	7	22.6	0.9	0.00206967	0.0733595	0.1	0.4	4.44192	3.85161	4.61773	6	5	5.1437	0.0031947	4.18853	0.0103958	1.83933	0.094765
27706-03B	1.2	0	478B	0.7321	0.0005	23220	60	780	3	21.4	1.9	2	7	63.3	1.1	0.0219603	0.778509	0.01	0.03	5.51947	0.423935	18.5388	7.4	0.6	0.565729	0.0027285	1.73527	0.033588	0.443801	0.0970267
27706-03C	1.44	0	478B	0.7321	0.0005	31180	70	3406	6	50	2	6	7	43.8	0.9	0.0960008	3.39949	0.007	0.008	5.31567	0.081699	58.069	7.11	0.11	0.109142	0.0014044	2.05189	0.109241	0.291427	0.0949562
27706-03D	1.73	0	478B	0.7321	0.0005	53960	70	7539	8	96	3	12	7	36.2	1	0.212576	7.52459	0.006	0.004	5.72068	0.0403312	79.9488	7.65	0.05	0.0540557	0.0006716	2.69361	0.139754	0.176884	0.0392258
27706-03E	2.08	0	478B	0.7321	0.0005	64280	70	10288	10	124	3	4	7	19.7	0.9	0.29021	10.2683	0.001	0.003	5.67511	0.0278106	90.8567	7.59	0.04	0.0374555	0.0003062	4.60312	0.160097	0.151697	0.0182134
27706-03F	2.5	0	478B	0.7321	0.0005	75720	70	12596	12	154	4	10	7	13.6	0.8	0.355519	12.5719	0.002	0.002	5.68869	0.0202338	94.6536	7.6	0.03	0.0274766	0.0001791	5.77426	0.166389	0.138005	0.0122313
27706-03G	3	0	478B	0.7321	0.0005	94370	80	15750	14	196	3	21	7	16.7	0.7	0.444693	15.7199	0.0046	0.0017	5.67432	0.0152241	94.7286	7.59	0.02	0.0209431	0.0001766	4.28823	0.166943	0.119484	0.0134669
27706-03H	3.6	0	478B	0.7321	0.0005	142600	90	24078	17	302	4	35	7	17.3	0.8	0.680064	24.032	0.0052	0.0011	5.70616	0.0111899	96.3765	7.629	0.015	0.0157857	0.0001214	4.55915	0.168899	0.0938074	0.0085996
27706-03I	4.32	0	478B	0.7321	0.0005	135420	80	22579	18	270	3	107	7	21.9	0.9	0.637926	22.5358	0.0179	0.0012	5.70646	0.013347	95.1758	7.63	0.018	0.0185315	0.0001616	4.14809	0.166786	0.100534	0.0093032
27706-03J	5.62	0	478B	0.7321	0.0005	18280	70	3102	5	40.1	1.4	37	7	1.5	0.6	0.0876907	3.09607	0.046	0.009	5.74848	0.066834	97.5496	7.68	0.09	0.0893192	8.21e-05	43.4073	0.169696	0.39552	0.00771
EBH18/MCB-1 - Aliquot #4
27706-04A	1	0	478B	0.7321	0.0005	21590	70	288	2	15.6	1.8	8	7	72.1	1.1	0.0081804	0.188175	0.11	0.09	0.179663	1.19832	0.23985	0.2	1.6	1.60531	0.0033414	1.60343	0.01335	0.808039	0.0878785
27706-04B	1.3	0	478B	0.7321	0.0005	152580	90	1974	4	114	3	18	7	482	3	0.0560578	1.28978	0.034	0.014	4.31049	0.409785	5.57645	5.8	0.5	0.547322	0.0031626	0.560872	0.0129369	0.23718	0.0283826
27706-04C	1.69	0	478B	0.7321	0.0005	137600	90	8130	9	158	3	16	7	312	2	0.231017	5.31202	0.007	0.003	5.46197	0.0765615	32.2821	7.3	0.1	0.102287	0.0022681	0.662287	0.0591033	0.130031	0.0493224
27706-04D	2.2	0	478B	0.7321	0.0005	129940	90	17227	14	230	4	21	7	100.6	1.2	0.48964	11.2559	0.0043	0.0016	5.79862	0.0217351	76.8971	7.75	0.03	0.0294621	0.0007738	1.18342	0.132613	0.106843	0.0351604
27706-04E	2.86	0	478B	0.7321	0.0005	187550	100	26630	20	340	6	24	7	115.6	1.4	0.75712	17.3997	0.003	0.001	5.74538	0.0170433	81.5957	7.68	0.02	0.0233177	0.0006164	1.24059	0.14202	0.0921341	0.0234256
27706-04F	3.72	0	478B	0.7321	0.0005	281070	100	37960	30	496	6	52	7	206.6	1.8	1.07985	24.8025	0.0049	0.0007	5.77879	0.0146716	78.058	7.726	0.02	0.0202512	0.0007349	0.84823	0.135077	0.0829473	0.0183332
27706-04G	4.84	0	478B	0.7321	0.0005	363840	130	58350	40	728	5	280	7	87.6	1.2	1.66122	38.125	0.0182	0.0005	5.78613	0.0076014	92.8221	7.736	0.01	0.0113963	0.0002404	1.36576	0.160422	0.0769056	0.0116009
27706-04H	6.29	0	478B	0.7321	0.0005	17060	70	2490	5	30.8	1.6	15	7	9.4	0.7	0.0708905	1.62693	0.023	0.011	5.71937	0.0947333	83.5092	7.65	0.13	0.1265	0.0005523	7.93208	0.146011	0.467161	0.049073
Table S1 Sullivan	EsiideVolcanics
EBH18/MCB-1 - Aliquot #5
27706-05A	1	0	478B	0.7321	0.0005	28540	70	290.7	1.8	18.8	1.1	15	7	90.4	1.2	0.00827703	0.187747	0.2	0.09	5.35838	1.23256	5.46044	7.2	1.6	1.64495	0.0031665	1.32512	0.0101905	0.665382	0.0757077
27706-05B	1.3	0	478B	0.7321	0.0005	111240	90	2669	5	93	2	18	7	325	2	0.075992	1.72376	0.026	0.01	5.30254	0.247319	12.7263	7.1	0.3	0.330114	0.0029232	0.678156	0.0240004	0.19859	0.04698
27706-05C	1.69	0	478B	0.7321	0.0005	81260	80	11805	11	148	2	18	7	51.5	1	0.33607	7.62421	0.006	0.002	5.57926	0.0272933	81.072	7.46	0.04	0.0367626	0.000634	1.9823	0.145309	0.141816	0.038118
27706-05D	2.2	0	478B	0.7321	0.0005	117830	90	20027	15	242	3	34	7	18.5	0.8	0.570159	12.9344	0.0062	0.0013	5.60558	0.0138822	95.304	7.495	0.018	0.0191961	0.0001573	4.51768	0.170016	0.106018	0.0114682
27706-05E	2.86	0	478B	0.7321	0.0005	211280	100	36380	20	433	5	77	7	23.6	0.9	1.03568	23.4959	0.0078	0.0007	5.61239	0.0085449	96.666	7.504	0.011	0.0124672	0.0001117	3.71422	0.172237	0.0813024	0.0077104
27706-05F	3.72	0	478B	0.7321	0.0005	364511	110	63620	40	773	6	237	7	23.9	0.9	1.8112	41.0887	0.0141	0.0004	5.61646	0.005734	98.0543	7.51	0.008	0.0091655	6.52e-05	3.90671	0.174584	0.0661382	0.0037048
27706-05G	4.84	0	478B	0.7321	0.0005	107560	90	18776	15	232	3	75	7	8.1	0.7	0.534528	12.1264	0.0152	0.0014	5.59837	0.0133143	97.7566	7.485	0.018	0.0184643	7.51e-05	9.03196	0.174616	0.11536	0.0062529
27706-05H	6.29	0	478B	0.7321	0.0005	7460	70	1268	3	14	1.2	-3	7	-0.2	0.7	0.0360947	0.818933	-0.01	0.02	5.93605	0.179139	100.909	7.9	0.2	0.239033	-3.05e-05	-315.999	0.169994	1.00612	0.0029845
EBH18/MCB-1 - Aliquot #6
27706-06A	1	0	478B	0.7321	0.0005	38230	80	690	3	30.8	2	2	7	116.7	1.3	0.0196598	0.442708	0.01	0.04	4.91466	0.5896	8.879	6.6	0.8	0.787134	0.003052	1.16473	0.0180663	0.454479	0.0772232
27706-06B	1.3	0	478B	0.7321	0.0005	99860	90	9326	11	144	4	18	7	159	1.4	0.265519	5.98361	0.007	0.003	5.61582	0.0461513	52.4638	7.51	0.06	0.0617873	0.0015922	0.882722	0.0934213	0.146295	0.0609551
27706-06C	1.69	0	478B	0.7321	0.0005	164410	100	25941	19	323	5	34	7	46.8	1.1	0.738513	16.6439	0.0047	0.001	5.7973	0.0137349	91.497	7.751	0.018	0.0190503	0.0002848	2.32465	0.157827	0.0938989	0.0158396
27706-06D	2.2	0	478B	0.7321	0.0005	254500	100	41580	30	510	6	34	7	45.7	0.9	1.18381	26.678	0.0028	0.0006	5.7909	0.0077214	94.6424	7.742	0.01	0.0115408	0.0001794	1.94311	0.163433	0.0741598	0.0109515
27706-06E	2.86	0	478B	0.7321	0.0005	425089	130	71640	40	880	8	64	7	30.4	0.9	2.03967	45.9646	0.003	0.0004	5.80514	0.0055046	97.8688	7.761	0.007	0.0090075	7.14e-05	3.03633	0.16859	0.0676361	0.0048648
27706-06F	3.72	0	478B	0.7321	0.0005	40040	80	6682	8	82	2	26	7	5.2	0.8	0.190231	4.28721	0.015	0.004	5.75676	0.0365645	96.0967	7.7	0.05	0.0490574	0.0001307	14.4942	0.166928	0.231588	0.0118864
EBH18/MCB-1 - Aliquot #7
27706-07A	1	0	478B	0.7321	0.0005	24080	80	959	3	20.2	1.6	8	7	65.9	1.2	0.0273017	1.25206	0.03	0.03	4.59549	0.370204	18.3041	6.1	0.5	0.494357	0.0027363	1.78951	0.0398306	0.43465	0.131716
27706-07B	1.3	0	478B	0.7321	0.0005	52530	80	6654	8	95	2	11	7	50.1	1	0.189432	8.68736	0.006	0.004	5.64519	0.0450601	71.5254	7.55	0.06	0.0603371	0.0009537	1.91045	0.126701	0.197584	0.0653619
27706-07C	1.69	0	478B	0.7321	0.0005	93030	90	15376	13	195	3	22	7	18.9	0.8	0.437749	20.0747	0.0052	0.0017	5.68102	0.0168241	93.9247	7.6	0.02	0.0230209	0.0002035	4.09172	0.165331	0.128175	0.0181508
27706-07D	2.2	0	478B	0.7321	0.0005	99440	90	16688	14	206	4	27	7	18.6	0.8	0.475107	21.7876	0.0058	0.0016	5.62384	0.0160181	94.4088	7.52	0.02	0.0219624	0.0001873	4.29021	0.167873	0.12493	0.0151941
27706-07E	2.86	0	478B	0.7321	0.0005	189780	100	32800	30	398	4	88	7	15.4	0.8	0.933795	42.8232	0.01	0.0008	5.64424	0.0091827	97.5795	7.547	0.012	0.0132606	8.11e-05	5.18651	0.172883	0.0988425	0.0058533
27706-07F	3.72	0	478B	0.7321	0.0005	24040	80	4117	6	50.1	1.8	66	7	2.4	0.7	0.117199	5.37509	0.062	0.006	5.66704	0.0572618	97.0885	7.58	0.08	0.0765726	9.75e-05	31.3709	0.171321	0.360091	0.0095326
EBH18/PERKCYN-1
27707-01A	1	0	478B	0.7324	0.0005	173580	110	3703	5	149	2	150	7	525	3	0.105433	16.3741	0.158	0.007	4.54222	0.223723	9.693	6.1	0.3	0.298909	0.0030248	0.527589	0.0213398	0.161032	0.0458914
27707-01B	1.3	0	478B	0.7324	0.0005	153230	100	5563	7	140	2	204	7	358	2	0.158368	24.5987	0.143	0.005	8.34648	0.126578	30.3069	11.15	0.17	0.168822	0.0023343	0.65371	0.0363109	0.146868	0.0419644
27707-01C	1.69	0	478B	0.7324	0.0005	237970	110	8629	10	199	4	326	7	530	3	0.245758	38.1561	0.148	0.003	9.23788	0.102671	33.5048	12.34	0.14	0.136983	0.0022272	0.554479	0.036269	0.122522	0.0343228
27707-01D	2.2	0	478B	0.7324	0.0005	96590	90	3939	6	85.9	2	146	7	208	1.8	0.112172	17.4176	0.144	0.007	8.76161	0.137702	35.7348	11.71	0.18	0.183589	0.0021525	0.862533	0.0407856	0.17236	0.0640482
27707-01E	2.86	0	478B	0.7324	0.0005	11520	80	781	3	11.6	1.3	69	7	19.9	0.8	0.02225	3.45346	0.34	0.03	7.14918	0.343158	48.4884	9.6	0.4	0.457614	0.0017253	4.36245	0.0678237	0.762027	0.138879
EBH18/PERKCYN-1 - Aliquot #2
27707-02A	1	0	478B	0.7324	0.0005	59590	90	1145	3	48.6	1.5	17	7	183.6	1.6	0.0326048	1.41783	0.06	0.02	4.15478	0.428335	7.98437	5.6	0.6	0.572397	0.003082	0.89213	0.0192173	0.312752	0.0748319
27707-02B	1.3	0	478B	0.7324	0.0005	56370	80	4955	7	79	3	37	7	95.4	1	0.141118	6.13569	0.029	0.005	5.62755	0.065209	49.4763	7.53	0.09	0.0872156	0.0016922	1.09752	0.087918	0.203687	0.0988342
27707-02C	1.69	0	478B	0.7324	0.0005	111210	100	17116	15	225	4	50	7	43.7	0.9	0.487442	21.1944	0.0109	0.0016	5.73358	0.0179626	88.2651	7.67	0.02	0.0246104	0.000393	2.14285	0.153944	0.122606	0.0279717
27707-02D	1.83333	0	478B	0.7324	0.0005	153150	100	24866	19	313	2	80	7	35.5	0.9	0.70817	30.7911	0.0122	0.0011	5.73156	0.0124453	93.0876	7.666	0.017	0.0175145	0.0002315	2.56125	0.162412	0.101418	0.0178948
27707-02E	2.38	0	478B	0.7324	0.0005	71450	80	11807	10	146	4	53	7	14.1	0.8	0.336253	14.6204	0.017	0.002	5.69508	0.0227143	94.1337	7.62	0.03	0.0308166	0.0001965	5.89992	0.165289	0.148768	0.0161347
27707-02F	3.09	0	478B	0.7324	0.0005	120040	90	20194	14	255	3	188	7	18.5	0.8	0.575108	25.0059	0.036	0.0013	5.67103	0.0130153	95.4286	7.586	0.017	0.0182207	0.0001531	4.24429	0.168274	0.103868	0.0129752
27707-02G	4.02	0	478B	0.7324	0.0005	4230	80	674	2	8.7	1.2	36	7	1.6	0.6	0.0191979	0.834603	0.21	0.04	5.59052	0.309136	89.077	7.5	0.4	0.4127	0.0003658	41.8648	0.159336	1.84952	0.0423103
EBH18/PERKCYN-1 - Aliquot #3
27707-03A	1	0	478B	0.7324	0.0005	18250	80	622	2	16.9	1.6	15	7	49.4	1.1	0.0177239	8.08212	0.09	0.04	5.64119	0.52449	19.239	7.5	0.7	0.700136	0.002705	2.19062	0.0341045	0.570709	0.148275
27707-03B	1.3	0	478B	0.7324	0.0005	34140	80	2397	5	38.4	1.6	34	7	58	0.9	0.068258	31.146	0.055	0.011	7.01895	0.123695	49.2808	9.38	0.16	0.165088	0.0016988	1.65048	0.0702111	0.32221	0.106378
27707-03C	1.69	0	478B	0.7324	0.0005	31160	80	2447	5	39.8	1.8	44	7	46.4	1	0.0696891	31.7957	0.07	0.011	7.08111	0.132222	55.6133	9.47	0.18	0.176444	0.0014867	2.26869	0.0785376	0.319666	0.0913799
27707-03D	2.2	0	478B	0.7324	0.0005	10570	80	1004	3	14.6	1.2	16	7	15.2	0.7	0.0286014	13.0457	0.06	0.03	6.02431	0.213628	57.2383	8	0.3	0.285141	0.0014323	4.46959	0.0950122	0.791313	0.151152
27707-03E	2.86	0	478B	0.7324	0.0005	6290	80	732	3	13.8	1.4	36	7	5.9	0.7	0.0208409	9.51143	0.19	0.04	6.18279	0.31863	71.8969	8.3	0.4	0.425198	0.0009413	12.4875	0.116285	1.26217	0.0925629
27707-03F	3.72	0	478B	0.7324	0.0005	4700	80	494	2	7.6	1.2	12	7	7.2	0.6	0.0140635	6.41892	0.1	0.05	5.1413	0.417225	54.0005	6.9	0.6	0.557158	0.0015407	8.98425	0.105033	1.67968	0.173659
EBH18/PERKCYN-1 - Aliquot #4
27707-04A	1	0	478B	0.7324	0.0005	11510	80	654	2	12.8	1	26	7	24.9	0.8	0.0186421	12.6291	0.16	0.04	6.20624	0.388553	35.309	8.3	0.5	0.518481	0.0021668	3.31821	0.0568927	0.767762	0.176453
27707-04B	1.3	0	478B	0.7324	0.0005	25540	80	1562	4	25.9	1.7	41	7	47.3	1	0.0445012	30.1632	0.103	0.017	7.31635	0.196778	44.7644	9.8	0.3	0.262444	0.0018501	2.11759	0.061184	0.408236	0.112334
27707-04C	1.69	0	478B	0.7324	0.0005	36920	80	2116	4	38.7	1.7	66	7	70.6	1.1	0.0602583	40.8613	0.122	0.013	7.48066	0.163799	42.8849	10	0.2	0.218473	0.001913	1.60551	0.0573277	0.306274	0.0981482
27707-04D	2.2	0	478B	0.7324	0.0005	10180	80	659	2	8	1.4	26	7	18.2	0.7	0.0187816	12.7257	0.15	0.04	7.20722	0.338526	46.7146	9.6	0.4	0.45142	0.0017847	3.92569	0.0648164	0.836773	0.1749
27707-04E	2.86	0	478B	0.7324	0.0005	2280	80	187.5	1.5	1.4	1.2	24	7	3.9	0.7	0.00534074	3.62074	0.49	0.14	5.97809	1.1844	49.2199	8	1.6	1.58061	0.0017008	18.321	0.0823338	3.45732	0.178248
EBH18/PERKCYN-1 - Aliquot #5
27707-05A	1	0	478B	0.7324	0.0005	21460	80	1118	3	22.4	1.6	40	7	45.5	0.9	0.0318384	14.9463	0.14	0.02	7.05417	0.252166	36.764	9.4	0.3	0.336327	0.002118	2.01936	0.0521167	0.482434	0.143599
27707-05B	1.3	0	478B	0.7324	0.0005	51850	80	2715	4	45.7	1.9	77	7	101.4	1.2	0.0773214	36.2082	0.111	0.01	7.94725	0.134636	41.6202	10.62	0.18	0.179582	0.0019554	1.18186	0.0523706	0.224559	0.0959267
27707-05C	1.69	0	478B	0.7324	0.0005	38370	80	2484	4	36.8	2	65	7	66.2	1	0.0707572	33.1275	0.103	0.011	7.48795	0.128745	48.4997	10.01	0.17	0.171777	0.001725	1.57069	0.0647703	0.279554	0.103253
27707-05D	2.2	0	478B	0.7324	0.0005	10000	80	817	2	13.2	1.3	41	7	13.3	0.7	0.0232936	10.8958	0.2	0.03	7.37669	0.285239	60.2969	9.9	0.4	0.380337	0.0013298	5.57235	0.0817398	0.835792	0.128897
27707-05E	2.86	0	478B	0.7324	0.0005	3360	80	364.3	2	4.5	1.1	64	7	4.2	0.6	0.0103874	4.85843	0.69	0.07	5.8368	0.555549	63.3697	7.8	0.7	0.74149	0.0012269	15.3843	0.108569	2.34447	0.144257
EBH18/PERKCYN-1 - Aliquot #6
27707-06A	1	0	478B	0.7324	0.0005	11170	80	448	2	10.5	1.3	18	7	28.7	0.8	0.0127636	16.9613	0.16	0.06	5.81694	0.599201	23.318	7.8	0.8	0.799761	0.0025684	3.07484	0.0400864	0.836155	0.187154
27707-06B	0.975	0	478B	0.7324	0.0005	15560	80	641	2	17.1	1.4	25	7	34.7	0.9	0.018281	24.2684	0.16	0.04	8.10672	0.459346	33.381	10.8	0.6	0.612107	0.0022313	2.77589	0.0411769	0.623542	0.148629
27707-06C	1.27	0	478B	0.7324	0.0005	2630	80	109.3	1.3	-0.5	1.3	10	7	5.9	0.7	0.00311845	4.13811	0.4	0.2	7.89163	1.96993	32.8359	10	3	2.62526	0.0022496	11.7617	0.0416085	3.13828	0.228343
27707-06D	1.65	0	478B	0.7324	0.0005	17680	80	714	2	12.9	1.2	29	7	39.3	0.9	0.0203738	27.0321	0.16	0.04	8.34469	0.377531	33.6972	11.2	0.5	0.503019	0.0022207	2.23601	0.0403816	0.572357	0.155753
27707-06E	2.15	0	478B	0.7324	0.0005	14640	80	593	3	15	1.5	32	7	31.4	0.8	0.0169325	22.4511	0.21	0.04	8.87126	0.448099	35.9487	11.8	0.6	0.596801	0.0021453	2.74944	0.0405226	0.700115	0.149507
27707-06F	2.79	0	478B	0.7324	0.0005	2080	80	136	1.4	3.3	1	22	7	3.6	0.7	0.00388418	5.14898	0.64	0.2	7.31622	1.69429	47.7867	10	2	2.25887	0.0017488	20.3148	0.0653161	3.79832	0.173021
EBH18/PERKCYN-1 - Aliquot #7
27707-07A	1	0	478B	0.7324	0.0005	21430	80	1097	3	21.3	1.3	33	7	46.9	1	0.0313193	10.1115	0.12	0.02	6.77849	0.270288	34.7006	9.1	0.4	0.360554	0.0021871	2.06869	0.0511922	0.476294	0.139812
27707-07B	1.3	0	478B	0.7324	0.0005	45140	80	3062	6	49	2	52	7	78.1	1.2	0.087465	28.2238	0.067	0.009	7.13052	0.122434	48.3871	9.53	0.16	0.163399	0.0017287	1.57185	0.0678592	0.25848	0.0811064
27707-07C	1.69	0	478B	0.7324	0.0005	44840	80	3364	5	52	2	54	7	73.2	1.1	0.0961079	31.0075	0.063	0.008	6.82656	0.0986073	51.2393	9.13	0.13	0.131678	0.0016332	1.47022	0.0750588	0.247034	0.0983344
27707-07D	2.2	0	478B	0.7324	0.0005	35490	80	2498	5	37.4	1.9	46	7	63.2	1.1	0.071384	23.0252	0.072	0.011	6.65129	0.133038	46.8329	8.89	0.18	0.177572	0.0017808	1.71317	0.0704118	0.308419	0.102595
27707-07E	2.86	0	478B	0.7324	0.0005	9170	80	828	3	11.6	1.2	21	7	13.2	0.7	0.0236666	7.63204	0.1	0.03	6.29863	0.286318	56.8882	8.4	0.4	0.382057	0.001444	5.7048	0.0903184	0.920989	0.141208
EBH18/PERKCYN-1 - Aliquot #8
27707-08A	1	0	478B	0.7324	0.0005	41290	60	1369	4	39.2	1.7	20	5	106.6	1.2	0.0386926	32.2171	0.09	0.02	6.90862	0.273724	22.9164	9.2	0.4	0.365104	0.0025818	1.16837	0.0331707	0.304485	0.066924
27707-08B	1.3	0	478B	0.7324	0.0005	40120	60	1975	4	36.1	1.4	33	5	79.4	1	0.0558046	46.4782	0.098	0.016	8.31949	0.161635	40.958	11.1	0.2	0.215488	0.0019776	1.3203	0.0492314	0.276481	0.0720862
27707-08C	1.69	0	478B	0.7324	0.0005	8560	60	610	2	9.2	1	14	5	13.8	0.7	0.0172442	14.3553	0.13	0.05	7.28869	0.343863	52.0016	9.7	0.4	0.458509	0.0016077	4.94612	0.0713456	0.771297	0.11642
27707-08D	2.2	0	478B	0.7324	0.0005	3640	60	295.3	1.8	2.9	0.9	17	5	6.2	0.6	0.00834533	6.94938	0.34	0.11	6.04687	0.661868	49.0718	8.1	0.9	0.883252	0.0017058	10.2069	0.0811523	1.64634	0.140045
EBH18/PERKCYN-1 - Aliquot #9
27707-09A	1	0	478B	0.7324	0.0005	47170	60	2264	5	43.4	1.9	18	5	114.1	1.2	0.0639661	24.3971	0.047	0.014	5.79435	0.167634	27.8141	7.8	0.2	0.223811	0.0024178	1.10353	0.0480022	0.266013	0.0634373
27707-09B	1.3	0	478B	0.7324	0.0005	41040	60	3892	7	51.8	1.6	20	5	50.3	1	0.109981	41.9406	0.031	0.008	6.68245	0.0764606	63.3978	8.94	0.1	0.102191	0.001226	1.91307	0.0948722	0.244327	0.0548543
27707-09C	1.69	0	478B	0.7324	0.0005	15980	60	1693	4	24.1	1.6	15	5	17.1	0.7	0.0478441	18.2439	0.051	0.019	6.41422	0.129984	68.0045	8.58	0.17	0.173523	0.0010717	4.11944	0.106021	0.461176	0.0769589
27707-09D	2.2	0	478B	0.7324	0.0005	10030	60	1328	4	14.3	1.2	22	5	6.6	0.7	0.03752	14.3107	0.1	0.02	6.05968	0.164168	80.2775	8.1	0.2	0.219151	0.0006606	10.5486	0.132478	0.667101	0.0516106
27707-09E	2.86	0	478B	0.7324	0.0005	530	60	102.8	1.3	0.9	1.2	2	5	-0.1	0.6	0.00290547	1.10778	0.1	0.3	5.48061	1.81467	105.72	7	2	2.4226	-0.0001916	-580.117	0.192899	11.1428	0.018958
EBH18/PERKCYN-1 - Aliquot #10
27707-10A	1	0	478B	0.7324	0.0005	155700	80	1806	5	112	3	24	5	488	2	0.051044	5.16266	0.078	0.018	5.55543	0.357157	6.44783	7.4	0.5	0.47681	0.0031334	0.442255	0.0116064	0.278147	0.0223973
27707-10B	1.3	0	478B	0.7324	0.0005	101690	80	7541	12	126	2	47	5	171.1	1.4	0.213067	21.5568	0.036	0.004	6.71103	0.0577394	49.7857	8.97	0.08	0.0772867	0.0016819	0.828552	0.0741848	0.175729	0.0373738
27707-10C	1.69	0	478B	0.7324	0.0005	136630	80	13486	19	187	4	81	5	156.2	1.6	0.381067	38.5513	0.036	0.002	6.67178	0.0361291	65.8814	8.92	0.05	0.0486213	0.0011428	0.994758	0.0987464	0.154861	0.0242485
27707-10D	2.2	0	478B	0.7324	0.0005	74840	70	9931	14	123	2	45	5	47.2	1	0.280597	28.3889	0.026	0.003	6.11697	0.0311202	81.1989	8.18	0.04	0.0419466	0.0006297	2.04399	0.132744	0.174704	0.026123
27707-10E	2.86	0	478B	0.7324	0.0005	14850	60	2218	5	28.1	1.5	2	5	6	0.6	0.0626644	6.3404	0.006	0.014	5.88917	0.0923651	88.0126	7.88	0.12	0.123403	0.0004015	10.8351	0.149448	0.484302	0.0332436
EBH18/PERKCYN-1 - Aliquot #11
27707-11A	1	0	478B	0.7324	0.0005	83850	80	1247	4	62.8	2	21	5	256.9	1.7	0.0352423	6.11784	0.1	0.02	5.72393	0.409708	8.51835	7.6	0.5	0.546893	0.0030641	0.664794	0.014882	0.298583	0.040593
27707-11B	1.3	0	478B	0.7324	0.0005	59560	70	6153	10	90	2	24	5	69	1	0.173838	30.1869	0.023	0.005	6.33269	0.0502645	65.4457	8.47	0.07	0.0673413	0.0011574	1.43104	0.103346	0.20603	0.0535701
27707-11C	1.69	0	478B	0.7324	0.0005	48980	70	6548	9	88	2	31	5	26.6	0.9	0.184985	32.1248	0.028	0.005	6.26743	0.0423096	83.82	8.38	0.06	0.0567763	0.0005419	3.30455	0.133739	0.20143	0.03212
27707-11D	2.2	0	478B	0.7324	0.0005	38330	70	5322	8	65.2	2	49	5	17.3	0.8	0.150351	26.11	0.054	0.006	6.23016	0.0499998	86.5421	8.33	0.07	0.0669857	0.0004508	4.90109	0.138908	0.23197	0.0266065
27707-11E	2.86	0	478B	0.7324	0.0005	11830	60	1113	3	14.4	1.2	10	5	18	0.7	0.0314566	5.46043	0.05	0.03	5.8009	0.189387	54.6125	7.8	0.2	0.252837	0.0015202	3.76552	0.0941448	0.619321	0.124304
EBH18/PERKCYN-1 - Aliquot #12
27707-12A	1	0	478B	0.7324	0.0005	114780	80	1366	4	86	2	10	5	360	2	0.0385904	13.963	0.04	0.02	5.21628	0.465768	6.21033	7	0.6	0.621943	0.0031414	0.590421	0.0119057	0.270238	0.0310412
27707-12B	1.3	0	478B	0.7324	0.0005	46320	70	2936	5	57.2	1.4	17	5	98.8	1.2	0.0829337	30.0112	0.034	0.011	5.73013	0.122964	36.3289	7.66	0.16	0.164221	0.0021326	1.20654	0.0633999	0.235214	0.0784273
27707-12C	1.69	0	478B	0.7324	0.0005	34730	70	2876	5	46.1	1.4	14	5	59.5	1	0.0812368	29.3979	0.029	0.011	5.89673	0.102124	48.8381	7.89	0.14	0.136414	0.0017136	1.61248	0.0828223	0.258936	0.0902486
27707-12D	2.2	0	478B	0.7324	0.0005	28240	70	2107	4	30.8	1.5	14	5	53.6	1	0.0595289	21.5374	0.04	0.015	5.81464	0.13926	43.4013	7.78	0.18	0.185953	0.0018957	1.79557	0.0746415	0.318494	0.10167
27707-12E	2.86	0	478B	0.7324	0.0005	9410	60	498	2	8	1.3	9	5	21.6	0.8	0.0140707	5.09046	0.1	0.06	5.93658	0.494907	31.4377	7.9	0.7	0.660509	0.0022964	3.75016	0.0529558	0.794746	0.151921
EBH18/PERKCYN-1 - Aliquot #13
27707-13A	1	0	478B	0.7324	0.0005	26000	70	694	2	23.9	1.4	15	5	75.3	1.1	0.0195934	16.8145	0.13	0.04	5.05394	0.469004	13.4908	6.8	0.6	0.626337	0.0028975	1.43852	0.0266936	0.423691	0.108467
27707-13B	1.3	0	478B	0.7324	0.0005	23450	70	1201	3	21.7	1.4	20	5	49.4	0.9	0.0339272	29.0982	0.1	0.03	7.24527	0.229031	37.124	9.7	0.3	0.305445	0.002106	1.82556	0.0512389	0.380948	0.1221
27707-13C	1.69	0	478B	0.7324	0.0005	27200	70	1659	4	27	1.4	25	5	50.1	0.9	0.0468491	40.1948	0.091	0.019	7.38583	0.17075	45.0627	9.9	0.2	0.227748	0.0018401	1.84788	0.0610124	0.346899	0.0954506
27707-13D	2.2	0	478B	0.7324	0.0005	5290	60	385	2	5.8	1	29	5	9	0.7	0.0108866	9.32791	0.46	0.08	6.73777	0.54157	49.1001	9	0.7	0.722366	0.0017048	7.44936	0.0728729	1.34799	0.151474
27707-13E	2.86	0	478B	0.7324	0.0005	18320	70	188.4	1.4	15.2	1.3	38	5	56.1	1	0.00532185	4.56462	1.21	0.17	8.43355	1.68005	8.67433	11	2	2.23808	0.0030589	1.88355	0.0102855	0.835424	0.0875272
EBH18/PERKCYN-1 - Aliquot #14
27707-14A	1	0	478B	0.7324	0.0005	58830	80	824	3	43.6	1.7	34	5	181.9	1.4	0.0232758	20.9286	0.25	0.04	5.48794	0.52174	7.69024	7.3	0.7	0.696542	0.0030918	0.789698	0.014013	0.367047	0.0566943
27707-14B	1.3	0	478B	0.7324	0.0005	31380	70	1034	3	28	1.6	32	5	72.3	1	0.0292167	26.2623	0.19	0.03	9.47846	0.293152	31.2523	12.7	0.4	0.390329	0.0023026	1.37941	0.0329719	0.380802	0.0922153
27707-14C	1.69	0	478B	0.7324	0.0005	36400	70	1272	3	29.6	1.9	50	5	76.2	1.1	0.0359174	32.3072	0.24	0.02	10.7432	0.256981	37.5468	14.3	0.3	0.341917	0.0020918	1.40848	0.0349494	0.328987	0.0810651
27707-14D	2.2	0	478B	0.7324	0.0005	18910	70	675	2	15	1.2	21	5	39.4	0.9	0.0190702	17.1442	0.19	0.05	10.5801	0.40223	37.7859	14.1	0.5	0.535087	0.0020838	2.25484	0.0357142	0.510823	0.107887
27707-14E	2.86	0	478B	0.7324	0.0005	4820	60	132.2	1.2	1.7	1	15	5	11.6	0.7	0.00373465	3.35772	0.7	0.2	10.2009	1.70825	27.9676	14	2	2.27272	0.0024127	6.36346	0.0274167	1.63221	0.170988
EBH18/PERKCYN-1 - Aliquot #15
27707-15A	1	0	478B	0.7324	0.0005	112390	80	1791	4	85	2	51	5	344.4	2	0.050573	20.4655	0.17	0.018	5.3536	0.332723	8.5328	7.2	0.4	0.444259	0.0030636	0.578403	0.0159384	0.260278	0.035733
27707-15B	1.3	0	478B	0.7324	0.0005	70720	70	2373	4	60	2	71	5	168.9	1.5	0.0670194	27.116	0.179	0.014	8.55112	0.197658	28.7058	11.4	0.3	0.263415	0.0023879	0.921688	0.0335696	0.219759	0.0542922
27707-15C	1.69	0	478B	0.7324	0.0005	86950	80	3061	6	72	2	88	5	188.5	1.5	0.0864463	34.9777	0.172	0.01	10.0254	0.15473	35.3055	13.4	0.2	0.20611	0.0021669	0.82738	0.0352161	0.230207	0.0436163
27707-15D	2.2	0	478B	0.7324	0.0005	34220	70	1293	3	30.8	1.5	43	5	76	1	0.0365045	14.7749	0.2	0.02	8.91582	0.245875	33.6876	11.9	0.3	0.327537	0.0022211	1.37467	0.0377841	0.33291	0.09552
27707-15E	2.86	0	478B	0.7324	0.0005	6620	60	233.3	1.6	6.7	0.9	10	5	16.2	0.8	0.00658795	2.66589	0.25	0.14	7.59115	1.05768	26.7454	10.1	1.4	1.40986	0.0024536	4.9989	0.0352323	1.20365	0.158248
EBH18/PERKCYN-1 - Aliquot #16
27707-16A	1	0	478B	0.7324	0.0005	58180	70	955	3	44	2	34	5	179.6	1.6	0.0269622	30.0854	0.21	0.03	4.76219	0.490929	7.81839	6.4	0.6	0.655753	0.0030875	0.872348	0.0164177	0.351032	0.0502731
27707-16B	1.3	0	478B	0.7324	0.0005	41710	70	1217	4	31.9	1.9	40	5	101.1	1.2	0.0343751	38.3392	0.2	0.03	9.47417	0.294796	27.6617	12.6	0.4	0.392518	0.0024229	1.17265	0.0291969	0.359044	0.0675645
27707-16C	1.69	0	478B	0.7324	0.0005	28030	70	865	3	25	1.4	25	5	65.1	1	0.0244243	27.2501	0.17	0.04	9.94679	0.376055	30.7011	13.3	0.5	0.500497	0.0023211	1.64684	0.0308654	0.437192	0.0874596
27707-16D	2.2	0	478B	0.7324	0.0005	3910	60	137.3	1.3	4	1	5	5	8.4	0.7	0.00387797	4.32536	0.2	0.2	10.2659	1.56846	36.0603	14	2	2.08664	0.0021416	8.36727	0.0351262	1.90381	0.171438
EBH18/PERKCYN-1 - Aliquot #17
27707-17A	1	0	478B	0.7324	0.0005	36810	70	840	3	31.2	1.8	16	5	108.2	1.2	0.0237308	8.81797	0.11	0.04	5.37495	0.418969	12.2762	7.2	0.6	0.559394	0.0029382	1.08458	0.0228397	0.3798	0.0933487
27707-17B	1.3	0	478B	0.7324	0.0005	39320	70	3119	5	49	2	38	5	56.9	1	0.0880729	32.742	0.074	0.01	7.16017	0.0950406	56.8211	9.57	0.13	0.126914	0.0014462	1.69089	0.0793573	0.247182	0.0783183
27707-17C	1.69	0	478B	0.7324	0.0005	40160	70	3740	6	55.2	1.6	37	5	43.4	1	0.10559	39.261	0.059	0.009	7.27177	0.0794358	67.7353	9.72	0.1	0.106142	0.0010807	2.20578	0.0931482	0.241354	0.0613317
27707-17D	2.2	0	478B	0.7324	0.0005	10290	70	1308	3	16.4	1.2	23	5	7.6	0.7	0.0369233	13.7308	0.1	0.02	6.14745	0.168042	78.1391	8.2	0.2	0.224306	0.0007322	9.28881	0.127108	0.696937	0.0643677
27707-17E	2.86	0	478B	0.7324	0.0005	3840	60	519	2	7.1	1.1	5	5	2.4	0.6	0.0146599	5.44825	0.05	0.06	6.00382	0.389043	81.2759	8	0.5	0.519208	0.0006271	26.608	0.135374	1.7567	0.0617137
EBH18/PERKCYN-1 - Aliquot #18
27707-18A	1	0	478B	0.7324	0.0005	88160	80	1368	4	66.6	1.9	36	5	267.8	1.7	0.0386127	24.0177	0.16	0.02	6.00165	0.374183	9.31431	8	0.5	0.499381	0.0030374	0.638507	0.0155196	0.279782	0.0421361
27707-18B	1.3	0	478B	0.7324	0.0005	68000	80	2407	5	60	3	66	5	145.7	1.4	0.0679656	42.2592	0.164	0.013	10.1791	0.179012	36.05	13.6	0.2	0.238368	0.0021419	0.974423	0.0354158	0.237717	0.0588467
27707-18C	1.69	0	478B	0.7324	0.0005	34440	70	1486	4	31.2	1.5	47	5	66.1	1	0.0419508	26.0894	0.19	0.02	9.90274	0.201326	42.742	13.2	0.3	0.268078	0.0019178	1.47762	0.0431618	0.32443	0.0854221
27707-18D	2.2	0	478B	0.7324	0.0005	7740	70	434.8	1.9	8.7	1	46	5	15.5	0.7	0.0122764	7.6337	0.64	0.07	7.15785	0.487931	40.2242	9.6	0.6	0.650631	0.0020021	4.43075	0.0561959	0.959822	0.173423
EBH18/PERKCYN-1 - Aliquot #19
27707-19A	1	0	478B	0.7324	0.0005	31620	70	703	2	26.7	1.6	5	5	91.5	1.3	0.0198493	20.0393	0.04	0.04	6.12745	0.568633	13.6304	8.2	0.8	0.758794	0.0028929	1.45756	0.0222448	0.428313	0.0802553
27707-19B	1.3	0	478B	0.7324	0.0005	15920	70	900	3	17.5	1.5	17	5	31.6	0.9	0.0254123	25.6549	0.11	0.04	7.20081	0.296245	40.734	9.6	0.4	0.395055	0.0019851	2.7581	0.0565686	0.543432	0.120763
27707-19C	1.69	0	478B	0.7324	0.0005	14880	70	992	3	18.6	1.4	9	5	23.9	0.8	0.0280098	28.2774	0.05	0.03	7.79361	0.257624	51.9994	10.4	0.3	0.343433	0.0016077	3.46832	0.0667206	0.546836	0.107844
27707-19D	2.2	0	478B	0.7324	0.0005	4430	60	441	2	8.4	1.2	5	5	5.2	0.7	0.012452	12.5709	0.07	0.07	6.50328	0.501462	64.7965	8.7	0.7	0.668985	0.0011791	13.6083	0.0996367	1.55888	0.10272
27707-19E	2.86	0	478B	0.7324	0.0005	3870	60	462	2	9.4	1.4	6	5	4.7	0.7	0.0130303	13.1695	0.07	0.07	5.36947	0.463782	64.0304	7.2	0.6	0.619223	0.0012048	14.7177	0.119249	1.74682	0.110667
27707-19F	3.72	0	478B	0.7324	0.0005	870	60	10.1	0.8	1.2	1.1	3	5	2.7	0.6	0.000284715	0.287905	2	3	7.11732	20.5534	8.26371	10	30	27.4062	0.0030726	25.8028	0.0116107	11.2495	0.189269
EBH18/PERKCYN-1 - Aliquot #20
27707-20A	1	0	478B	0.7324	0.0005	86910	80	1760	4	73	2	26	5	257.2	1.6	0.049686	13.0248	0.088	0.018	5.74795	0.268521	11.6461	7.7	0.4	0.35845	0.0029593	0.613117	0.0202613	0.253043	0.0525789
27707-20B	1.3	0	478B	0.7324	0.0005	64870	80	4683	6	79	1.7	34	5	113.1	1.2	0.132188	34.6563	0.044	0.007	6.64098	0.0763034	47.9623	8.88	0.1	0.101982	0.001743	1.03309	0.0722217	0.182268	0.074809
27707-20C	1.69	0	478B	0.7324	0.0005	44640	70	4342	6	65.5	1.8	27	5	60.2	1	0.122557	32.1327	0.038	0.007	6.14446	0.0729419	59.7857	8.22	0.1	0.0975124	0.0013469	1.71302	0.0973002	0.213798	0.072807
27707-20D	2.2	0	478B	0.7324	0.0005	17340	70	2459	5	32.3	2	31	5	9.6	0.6	0.0694194	18.1977	0.076	0.013	5.89182	0.0812266	83.5905	7.88	0.11	0.108555	0.0005496	6.5536	0.141875	0.433196	0.0519186
27707-20E	2.86	0	478B	0.7324	0.0005	2100	60	268.7	1.7	3.4	1.1	14	5	1.4	0.6	0.00758473	1.9885	0.32	0.12	6.22296	0.709672	79.7793	8.3	0.9	0.946923	0.0006773	42.3301	0.128201	3.17168	0.0717853
EBH18/PERKCYN-1 - Aliquot #21
27707-21A	1	0	478B	0.7324	0.0005	65480	70	896	3	52	2	30	5	200.8	1.4	0.0252764	18.8862	0.2	0.04	6.1754	0.482909	8.44844	8.2	0.6	0.644387	0.0030664	0.719186	0.0136808	0.359333	0.0505665
27707-21B	1.3	0	478B	0.7324	0.0005	56720	70	1969	4	47.2	1.6	70	5	122.6	1.5	0.0555817	41.5033	0.216	0.017	10.2165	0.238522	35.4856	13.6	0.3	0.317486	0.0021609	1.26893	0.0347336	0.25564	0.0536306
27707-21C	1.69	0	478B	0.7324	0.0005	47930	70	1696	4	38.4	1.8	57	5	96.1	1.2	0.0478618	35.7489	0.205	0.019	11.3428	0.226975	40.1439	15.1	0.3	0.301921	0.0020048	1.31711	0.0353914	0.28246	0.0609507
27707-21D	2.2	0	478B	0.7324	0.0005	3810	60	183.2	1.4	3.1	1.3	25	5	7.3	0.6	0.00517187	3.86156	0.82	0.18	8.95048	1.13241	43.0852	12	1.5	1.50798	0.0019063	9.23711	0.0481372	1.86983	0.168381
EBH18/PERKCYN-1 - Aliquot #22
27707-22A	1	0	478B	0.7324	0.0005	25580	70	846	3	23.2	1.9	13	5	71.2	1.1	0.0238917	20.0104	0.09	0.04	5.11352	0.413693	16.9257	6.8	0.6	0.552453	0.0027825	1.63691	0.0330999	0.428805	0.10425
27707-22B	1.3	0	478B	0.7324	0.0005	26790	70	1629	4	28	1.5	22	5	50.8	1	0.0459797	38.5307	0.084	0.02	7.13505	0.187135	43.403	9.5	0.2	0.24962	0.0018957	1.96735	0.0608307	0.34934	0.0978994
27707-22C	1.69	0	478B	0.7324	0.0005	15470	70	1147	3	15	1.5	18	5	22.4	0.8	0.0323828	27.1299	0.1	0.03	7.64135	0.216469	56.6946	10.2	0.3	0.288627	0.0014505	3.57385	0.0741945	0.529477	0.101267
27707-22D	2.2	0	478B	0.7324	0.0005	3670	60	434	2	6.1	1.1	14	5	3.4	0.6	0.0122543	10.2654	0.19	0.07	6.1088	0.437935	72.3269	8.2	0.6	0.584408	0.0009269	17.6749	0.118398	1.82181	0.0950251
27707-22E	2.86	0	478B	0.7324	0.0005	2060	60	171.8	1.4	2.1	1.1	2	5	3	0.6	0.00484961	4.06358	0.06	0.19	6.80246	1.16892	56.8894	9.1	1.6	1.55903	0.0014439	21.7038	0.0836306	3.20175	0.137916
EBH18/PERKCYN-1 - Aliquot #23
27707-23A	1	0	478B	0.7324	0.0005	31120	70	1436	4	29.2	1.9	18	5	75.5	1	0.0405124	29.451	0.07	0.02	5.98349	0.209801	27.6124	8	0.3	0.280042	0.0024246	1.31713	0.0461477	0.342732	0.107377
27707-23B	1.3	0	478B	0.7324	0.0005	30000	70	2035	4	34.2	1.8	27	5	47.1	0.9	0.0574197	41.7359	0.08	0.016	7.82649	0.142566	53.1109	10.46	0.19	0.190152	0.0015705	2.00455	0.0678604	0.309273	0.0827623
27707-23C	1.69	0	478B	0.7324	0.0005	10590	60	1086	3	16.4	1	13	5	11.2	0.7	0.0306444	22.2728	0.07	0.03	6.66584	0.204123	68.3787	8.9	0.3	0.272347	0.0010591	6.33804	0.102581	0.666254	0.0877532
27707-23D	2.2	0	478B	0.7324	0.0005	2400	60	318.9	1.9	4.1	1.2	4	5	1.1	0.6	0.00899723	6.54033	0.08	0.1	6.50587	0.61892	86.4164	8.7	0.8	0.825669	0.000455	57.3377	0.132828	2.67162	0.044366
